# Supplementary material for: Decreased Immunity to Varicella Zoster Virus in Giant Cell Arteritis
Source: PubMed Central journal article supplement (PMC5661055; doi:10.3389/fimmu.2017.01377), 2017-10-24
Supplement: table_1.pdf [file table_1.pdf]

**Supplementary Table 1.** Characteristics of patients and healthy controls whose samples were used for determination of VZV-IgG levels (Figure 4).

|                                                                       | HC (n=58)        | GCA patients (n=35)  |                         |                        |                        |                         | PMR patients (n=26)  |                         |                        |                       |                         |
|-----------------------------------------------------------------------|------------------|----------------------|-------------------------|------------------------|------------------------|-------------------------|----------------------|-------------------------|------------------------|-----------------------|-------------------------|
| Sex, no. female/male                                                  | 41/17            | 25/10                |                         |                        |                        |                         | 17/9                 |                         |                        |                       |                         |
| Age at time of first sample, median (interquartile range) years       | 67.7 (62.2-74.9) | 73.2 (63.8-79.0)     |                         |                        |                        |                         | 73.7 (64.7-78.9) *   |                         |                        |                       |                         |
| GCA diagnosis at baseline:<br>FDG PET-CT TAB FDG PET-CT+TAB           | NA               | 17 9 9               |                         |                        |                        |                         | NA                   |                         |                        |                       |                         |
| PMR diagnosis at baseline:<br>FDG PET-CT Chuang FDG PET-CT+Chuang     | NA               | 3 0 6                |                         |                        |                        |                         | 3 5 17†              |                         |                        |                       |                         |
|                                                                       |                  | <b>T=0</b><br>(n=33) | <b>≤2 mo.</b><br>(n=12) | <b>6 mo.</b><br>(n=11) | <b>1 yr.</b><br>(n=14) | <b>≥2 yr.</b><br>(n=11) | <b>T=0</b><br>(n=25) | <b>≤2 mo.</b><br>(n=12) | <b>6 mo.</b><br>(n=11) | <b>1 yr.</b><br>(n=8) | <b>≥2 yr.</b><br>(n=16) |
| Time since diagnosis, median (interquartile range) months             |                  | NA                   | 0.5 (0.4-0.7)           | 7.1 (6.4-8.6)          | 11.6 (10.2-13.6)       | 32.6 (21.3-35.8)        | NA                   | 0.7 (0.5-0.8)           | 7.5 (6.8-8.4)          | 9.8 (9.4-10.5)        | 24.9 (23.0-27.8)        |
| Cumulative prednisone dosage, median (interquartile range) mg         | NA               | NA‡                  | 840 (615-1185)          | 5655 (5600-6233)       | 6561 (5600-8175)       | 10808 (7446-12186)      | NA                   | 360 (320-1670)          | 2760 (1895-3090)       | 3375 (3198-4301)      | 5949 (3377-7600)        |
| Use of methotrexate, no. (%) – dose range in mg/week                  | NA               | NA                   | 0 (0)                   | 1 (9) – 15             | 2 (14) – 15-15         | 3 (27) – 15-25          | NA                   | 0 (0)                   | 0 (0)                  | 1 (13) - 15           | 1 (6) - 10              |
| Use of leflunomide, no. (%) – dose range in mg/day                    | NA               | NA                   | 0 (0)                   | 0 (0)                  | 1 (7) - 10             | 0 (0)                   | NA                   | 0 (0)                   | 1 (9) - 10             | 0 (0)                 | 1 (6) - 10              |
| No. of patients that experienced relapse since diagnosis (%)          | NA               | NA                   | 1 (9)                   | 0 (0)                  | 6 (43)                 | 6 (55)                  | NA                   | 0 (0)                   | 4 (36)                 | 2 (25)                | 9 (56)                  |
| Leukocyte count, median (interquartile range) 10 <sup>9</sup> cells/L | 5.5 (4.9-6.4)    | 9.1 (8.1-11.5) ***   | 17.2 (9.2-23.6) ***     | 11 (9.6-12.2) ***      | 9.5 (7.2-12.2) ***     | 7.9 (7.0-9.8) ***       | 8.7 (7.1-11.1) ***   | 11.4 (9.3-13.5) ***     | 9.1 (6.2-12.3) ***     | 8.3 (7.5-9.3) ***     | 7.4 (5.5-9.7) **        |
| Haemoglobin, median (interquartile range) mmol/l                      | 8.7 (8.2-9.2)    | 7.1 (6.6-7.5) ***    | 7.8 (7.3-8.0) ***       | 8.1 (7.5-8.5) **       | 8.1 (6.6-8.8) **       | 7.7 (6.8-8.3) ***       | 7.5 (7.3-8.4) ***    | 8.3 (7.6-8.7) *         | 8.1 (7.8-9.2)          | 8.4 (7.8-9.2) *       | 8.2 (7.1-9.0)           |
| ESR, median (interquartile range) mm/hr                               | 9 (4-13)         | 99 (59-104) ***      | 11 (5-45)               | 24 (16-34) ***         | 28 (14-37) ***         | 28 (15-40) ***          | 51 (39-74) ***       | 12 (6-30)               | 22 (9-30) **           | 13 (3-44)             | 15 (5-36)               |
| CRP, median (interquartile range) mg/L                                | <5 (<5-<5)       | 54 (25-96) ***       | 5 (<5-6) ***            | 7 (<5-12) ***          | 6 (<5-13) ***          | 10 (<5-15) ***          | 44 (27-73) ***       | <5 (<5-7) **            | 7 (<5-11) ***          | 10 (<5-26) ***        | <5 (<5-6) **            |

HC = healthy controls; GCA = giant cell arteritis; PMR = polymyalgia rheumatica; T=0 = before start of treatment with prednisone; ≤2 mo. = within 2 months after start of treatment; 6 mo. = at approximately 6 months of follow-up; 1 yr. = at approximately 1 year of follow-up; 2 yr. = at approximately 2 years of follow-up, or more; FDG PET-CT = no. of patients with <sup>18</sup>F-fluorodeoxyglucose-positron emission tomography/computed tomography supporting diagnosis; TAB = no. of patients with temporal artery biopsy positive for GCA; NA = not applicable; Chuang: no. of patients fulfilling the Chuang and Hunder PMR criteria; ESR = erythrocyte sedimentation rate; CRP = C-reactive protein.

† One patient did not fulfil Chuang and Hunder criteria or had FDG PET-CT proven PMR, but fulfilled the 2012 European League Against Rheumatism/American College of Rheumatology criteria for PMR.

‡ One patient received prednisone treatment because of PMR until approximately 5 months before GCA diagnosis.

\* P value <0.05; \*\* P value <0.01; \*\*\* P value <0.001 for comparison to healthy control group.
